# Supplementary material for: Diversity and Community Structure of Zooplankton in Homestead Ponds of a Tropical Coastal Area
Source: MDPI journal article supplement (doi:10.3390/d14090755), 2022-09-13
Supplement: s1 [file s1]

**Supplementary Table S1.** Results of one-way ANOSIM and SIMPER analysis on the zooplankton abundance between different stations.

| ANOSIM                                |       |       |                                  |                              |                  |
|---------------------------------------|-------|-------|----------------------------------|------------------------------|------------------|
| Groups                                | R     | p     | Most discriminating species      | SIMPER average dissimilarity | Contribution (%) |
| S <sub>1</sub> versus S <sub>2</sub>  | 1.00  | 0.096 | <i>Cyclops nanus</i>             | 2.42                         | 15.55            |
| S <sub>1</sub> versus S <sub>3</sub>  | 0.926 | 0.099 | <i>Brachionus</i> sp.            | 1.88                         | 14.52            |
| S <sub>1</sub> versus S <sub>4</sub>  | 1.00  | 0.103 | <i>Keratella cochlearis</i>      | 3.03                         | 12.3             |
| S <sub>1</sub> versus S <sub>5</sub>  | 1.00  | 0.109 | <i>Mesocyclops leuckarti</i>     | 2.83                         | 15.22            |
| S <sub>1</sub> versus S <sub>6</sub>  | 1.00  | 0.099 | Nauplii                          | 3.77                         | 14.3             |
| S <sub>1</sub> versus S <sub>7</sub>  | 1.00  | 0.099 | <i>Brachionus calyciflorus</i>   | 3.79                         | 19.1             |
| S <sub>1</sub> versus S <sub>8</sub>  | 1.00  | 0.100 | <i>Diaptomus gracilis</i>        | 1.97                         | 10.11            |
| S <sub>1</sub> versus S <sub>9</sub>  | 1.00  | 0.096 | <i>Brachionus calyciflorus</i>   | 3.79                         | 18.34            |
| S <sub>1</sub> versus S <sub>10</sub> | 1.00  | 0.095 | <i>Cyclops nanus</i>             | 2.32                         | 13.48            |
| S <sub>2</sub> versus S <sub>3</sub>  | 0.741 | 0.099 | Nauplii                          | 1.66                         | 13.14            |
| S <sub>2</sub> versus S <sub>4</sub>  | 1.00  | 0.102 | <i>Keratella cochlearis</i>      | 3.37                         | 14.29            |
| S <sub>2</sub> versus S <sub>5</sub>  | 1.00  | 0.102 | <i>Diaphanosoma sarsi</i>        | 2.89                         | 17.09            |
| S <sub>2</sub> versus S <sub>6</sub>  | 1.00  | 0.103 | Nauplii                          | 4.75                         | 19.57            |
| S <sub>2</sub> versus S <sub>7</sub>  | 1.00  | 0.097 | <i>Brachionus calyciflorus</i>   | 3.33                         | 14.09            |
| S <sub>2</sub> versus S <sub>8</sub>  | 0.482 | 0.100 | <i>Diaptomus gracilis</i>        | 2.17                         | 14.74            |
| S <sub>2</sub> versus S <sub>9</sub>  | 1.00  | 0.100 | <i>Brachionus calyciflorus</i>   | 3.33                         | 18.12            |
| S <sub>2</sub> versus S <sub>10</sub> | 0.741 | 0.099 | <i>Diaptomus gracilis</i>        | 2.53                         | 21.49            |
| S <sub>3</sub> versus S <sub>4</sub>  | 1.00  | 0.100 | <i>Mesocyclops leuckarti</i>     | 3.30                         | 14.09            |
| S <sub>3</sub> versus S <sub>5</sub>  | 1.00  | 0.100 | <i>Brachionus quadridentatus</i> | 1.73                         | 9.774            |
| S <sub>3</sub> versus S <sub>6</sub>  | 1.00  | 0.103 | <i>Brachionus rubens</i>         | 3.44                         | 13.06            |
| S <sub>3</sub> versus S <sub>7</sub>  | 1.00  | 0.098 | <i>Brachionus calyciflorus</i>   | 2.89                         | 13.68            |
| S <sub>3</sub> versus S <sub>8</sub>  | 0.963 | 0.104 | <i>Diaptomus gracilis</i>        | 2.01                         | 11.16            |
| S <sub>3</sub> versus S <sub>9</sub>  | 1.00  | 0.099 | <i>Brachionus calyciflorus</i>   | 2.89                         | 14.97            |
| S <sub>3</sub> versus S <sub>10</sub> | 1.00  | 0.099 | <i>Diaptomus gracilis</i>        | 2.34                         | 17.36            |
| S <sub>4</sub> versus S <sub>5</sub>  | 1.00  | 0.104 | <i>Mesocyclops leuckarti</i>     | 4.88                         | 16.69            |
| S <sub>4</sub> versus S <sub>6</sub>  | 1.00  | 0.102 | <i>Brachionus rubens</i>         | 5.33                         | 19.69            |
| S <sub>4</sub> versus S <sub>7</sub>  | 1.00  | 0.097 | <i>Brachionus rubens</i>         | 3.59                         | 12.53            |
| S <sub>4</sub> versus S <sub>8</sub>  | 1.00  | 0.100 | <i>Brachionus rubens</i>         | 3.27                         | 11.84            |
| S <sub>4</sub> versus S <sub>9</sub>  | 1.00  | 0.096 | <i>Brachionus rubens</i>         | 4.05                         | 14.82            |
| S <sub>4</sub> versus S <sub>10</sub> | 1.00  | 0.098 | <i>Brachionus rubens</i>         | 3.19                         | 12.36            |
| S <sub>5</sub> versus S <sub>6</sub>  | 1.00  | 0.102 | <i>Keratella cochlearis</i>      | 2.89                         | 13.08            |
| S <sub>5</sub> versus S <sub>7</sub>  | 1.00  | 0.098 | <i>Diaphanosoma sarsi</i>        | 3.49                         | 15.54            |
| S <sub>5</sub> versus S <sub>8</sub>  | 0.519 | 0.103 | Nauplii                          | 1.94                         | 14.62            |
| S <sub>5</sub> versus S <sub>9</sub>  | 1.00  | 0.097 | <i>Brachionus calyciflorus</i>   | 3.10                         | 16.9             |
| S <sub>5</sub> versus S <sub>10</sub> | 1.00  | 0.104 | <i>Diaphanosoma sarsi</i>        | 2.55                         | 17.69            |
| S <sub>6</sub> versus S <sub>7</sub>  | 1.00  | 0.100 | <i>Brachionus calyciflorus</i>   | 4.63                         | 16.73            |
| S <sub>6</sub> versus S <sub>8</sub>  | 1.00  | 0.097 | Nauplii                          | 4.79                         | 20.51            |
| S <sub>6</sub> versus S <sub>9</sub>  | 1.00  | 0.099 | <i>Brachionus calyciflorus</i>   | 4.63                         | 16.57            |
| S <sub>6</sub> versus S <sub>10</sub> | 1.00  | 0.098 | Nauplii                          | 3.73                         | 15.49            |
| S <sub>7</sub> versus S <sub>8</sub>  | 1.00  | 0.099 | <i>Brachionus quadridentatus</i> | 3.01                         | 14.58            |
| S <sub>7</sub> versus S <sub>9</sub>  | 1.00  | 0.099 | <i>Mesocyclops leuckarti</i>     | 2.14                         | 16.32            |
| S <sub>7</sub> versus S <sub>10</sub> | 1.00  | 0.095 | <i>Brachionus calyciflorus</i>   | 2.97                         | 17.85            |

|                                       |       |       |                                  |      |       |
|---------------------------------------|-------|-------|----------------------------------|------|-------|
| S <sub>8</sub> versus S <sub>9</sub>  | 1.00  | 0.101 | <i>Brachionus quadridentatus</i> | 2.81 | 16.35 |
| S <sub>8</sub> versus S <sub>10</sub> | 0.296 | 0.198 | <i>Brachionus quadridentatus</i> | 2.24 | 17.53 |
| S <sub>9</sub> versus S <sub>10</sub> | 1.00  | 0.096 | <i>Brachionus calyciflorus</i>   | 2.97 | 23.2  |

**Supplementary Table S2.** Average dissimilarity and discriminating species in each station and season using SIMPER analysis.

| Average dissimilarity (%)        |       |                                  |       |                                  |       |                                  |       |
|----------------------------------|-------|----------------------------------|-------|----------------------------------|-------|----------------------------------|-------|
| S <sub>1</sub>                   |       | S <sub>2</sub>                   |       | S <sub>3</sub>                   |       | S <sub>4</sub>                   |       |
| 36.53                            |       | 20.22                            |       | 26.69                            |       | 34.04                            |       |
| Contributory species             |       |                                  |       |                                  |       |                                  |       |
| S <sub>1</sub>                   |       | S <sub>2</sub>                   |       | S <sub>3</sub>                   |       | S <sub>4</sub>                   |       |
| Species                          | (%)   | Species                          | (%)   | Species                          | (%)   | Species                          | (%)   |
| <i>Brachionus calyciflorus</i>   | 20.20 | <i>Diaptomus</i> sp.             | 17.70 | <i>Cyclops nanus</i>             | 14.27 | <i>Brachionus calyciflorus</i>   | 12.18 |
| <i>Brachionus</i> sp.            | 10.12 | <i>Brachionus calyciflorus</i>   | 13.21 | <i>Brachionus quadridentatus</i> | 12.88 | <i>Cyclops nanus</i>             | 10.77 |
| <i>Diaptomus</i> sp.             | 9.11  | <i>Brachionus quadridentatus</i> | 11.02 | <i>Brachionus urceolaris</i>     | 11.46 | <i>Diaphanosoma sarsi</i>        | 9.41  |
| <i>Brachionus quadridentatus</i> | 9.10  | <i>Diaphanosoma sarsi</i>        | 11.01 | Nauplii                          | 11.43 | <i>Brachionus urceolaris</i>     | 9.22  |
| <i>Cyclops nanus</i>             | 9.07  | <i>Cyclops nanus</i>             | 10.99 | <i>Asplanchna sieboldi</i>       | 9.98  | <i>Ceriodaphnia cornuta</i>      | 9.15  |
| Nauplii                          | 7.09  | <i>Cyclops</i> sp.               | 8.05  | <i>Cyclops</i> sp.               | 8.55  | <i>Brachionus quadridentatus</i> | 9.09  |
| <i>Diaphanosoma sarsi</i>        | 7.06  | <i>Brachionus rubens</i>         | 7.39  | <i>Mesocyclops leuckarti</i>     | 7.13  | <i>Cyclops</i> sp.               | 9.01  |
| <i>Mesocyclops leuckarti</i>     | 7.05  | <i>Bosmina</i> sp.               | 5.89  | <i>Brachionus calyciflorus</i>   | 5.22  | <i>Diaptomus</i> sp.             | 8.25  |
| <i>Brachionus urceolaris</i>     | 7.05  | Nauplii                          | 5.89  | <i>Diaptomus</i> sp.             | 4.71  | Nauplii                          | 7.35  |
| <i>Bosmina</i> sp.               | 5.08  |                                  |       | <i>Brachionus rubens</i>         | 4.30  | <i>Keratella cochlearis</i>      | 6.11  |
| Total                            | 90.90 |                                  | 91.14 |                                  |       |                                  | 90.52 |
| Average dissimilarity (%)        |       |                                  |       |                                  |       |                                  |       |
| S <sub>5</sub>                   |       | S <sub>6</sub>                   |       | S <sub>7</sub>                   |       | S <sub>8</sub>                   |       |
| 36.33                            |       | 24.42                            |       | 26.58                            |       | 23.89                            |       |
| Contributory species             |       |                                  |       |                                  |       |                                  |       |
| S <sub>5</sub>                   |       | S <sub>6</sub>                   |       | S <sub>7</sub>                   |       | S <sub>8</sub>                   |       |
| <i>Bosmina</i> sp.               | 21.33 | <i>Diaphanosoma sarsi</i>        | 18.89 | <i>Diaptomus</i> sp.             | 16.20 | <i>Brachionus calyciflorus</i>   | 19.24 |
| <i>Ceriodaphnia cornuta</i>      | 12.82 | <i>Bosmina</i> sp.               | 14.07 | <i>Diaptomus gracilis</i>        | 16.15 | <i>Diaptomus gracilis</i>        | 17.81 |
| <i>Diaptomus</i> sp.             | 9.64  | <i>Brachionus rubens</i>         | 11.25 | <i>Diaphanosoma sarsi</i>        | 13.21 | <i>Diaphanosoma sarsi</i>        | 15.86 |
| <i>Diaptomus gracilis</i>        | 8.44  | <i>Keratella cochlearis</i>      | 10.95 | <i>Brachionus urceolaris</i>     | 8.79  | <i>Cyclops nanus</i>             | 10.46 |
| <i>Diaphanosoma sarsi</i>        | 7.78  | Nauplii                          | 10.94 | <i>Brachionus</i> sp.            | 8.72  | <i>Diaptomus</i> sp.             | 7.70  |

|                                  |              |                                  |              |                                  |              |                                  |              |
|----------------------------------|--------------|----------------------------------|--------------|----------------------------------|--------------|----------------------------------|--------------|
| <i>Cyclops nanus</i>             | 7.51         | <i>Ceriodaphnia cornuta</i>      | 7.84         | <i>Cyclops nanus</i>             | 7.32         | <i>Ceriodaphnia cornuta</i>      | 7.02         |
| <i>Brachionus rubens</i>         | 7.28         | <i>Diaptomus</i> sp.             | 7.61         | <i>Mesocyclops leuckarti</i>     | 7.31         | <i>Cyclops</i> sp.               | 5.32         |
| <i>Mesocyclops leuckarti</i>     | 5.76         | <i>Cyclops nanus</i>             | 7.46         | <i>Bosmina</i> sp.               | 5.80         | <i>Brachionus rubens</i>         | 5.31         |
| <i>Brachionus</i> sp.            | 5.38         | <i>Brachionus calyciflorus</i>   | 6.18         | <i>Cyclops</i> sp.               | 4.39         | <i>Bosmina</i> sp.               | 4.82         |
| <i>Cyclops</i> sp.               | 5.27         |                                  |              |                                  |              |                                  |              |
| <i>Brachionus calyciflorus</i>   | 5.05         |                                  |              |                                  |              |                                  |              |
| <b>Total</b>                     | <b>96.26</b> |                                  | <b>95.18</b> |                                  |              |                                  | <b>93.54</b> |
| <b>Average dissimilarity (%)</b> |              |                                  |              |                                  |              |                                  |              |
| S <sub>9</sub>                   |              | S <sub>10</sub>                  |              | December                         |              | February                         |              |
| 22.27                            |              | 22.41                            |              | 23.26                            |              | 20.44                            |              |
| <b>Contributory species</b>      |              |                                  |              |                                  |              |                                  |              |
| S <sub>9</sub>                   |              | S <sub>10</sub>                  |              | December                         |              | February                         |              |
| Species                          | (%)          | Species                          | (%)          | Species                          | (%)          | Species                          | (%)          |
| <i>Diaptomus gracilis</i>        | 15.57        | <i>Diaptomus gracilis</i>        | 21.4         | <i>Diaptomus gracilis</i>        | 10.59        | <i>Brachionus calyciflorus</i>   | 13.84        |
| <i>Brachionus urceolaris</i>     | 14           | <i>Diaphanosoma sarsi</i>        | 14.35        | Nauplii                          | 9.22         | <i>Brachionus rubens</i>         | 9.67         |
| <i>Diaptomus</i> sp.             | 12.11        | Nauplii                          | 10.84        | <i>Brachionus calyciflorus</i>   | 9.00         | Nauplii                          | 8.97         |
| <i>Diaphanosoma sarsi</i>        | 10.84        | <i>Brachionus calyciflorus</i>   | 9.12         | <i>Bosmina</i> sp.               | 8.55         | <i>Brachionus urceolaris</i>     | 8.13         |
| <i>Cyclops nanus</i>             | 9.50         | <i>Bosmina</i> sp.               | 7.40         | <i>Ceriodaphnia cornuta</i>      | 7.62         | <i>Brachionus quadridentatus</i> | 8.02         |
| <i>Mesocyclops leuckarti</i>     | 7.07         | <i>Ceriodaphnia cornuta</i>      | 6.05         | <i>Brachionus quadridentatus</i> | 7.45         | <i>Mesocyclops leuckarti</i>     | 7.43         |
| Nauplii                          | 6.90         | <i>Brachionus rubens</i>         | 5.54         | <i>Mesocyclops leuckarti</i>     | 7.18         | <i>Bosmina</i> sp.               | 6.74         |
| <i>Brachionus rubens</i>         | 5.17         | <i>Brachionus quadridentatus</i> | 5.44         | <i>Diaphanosoma sarsi</i>        | 6.75         | <i>Diaphanosoma sarsi</i>        | 6.73         |
| <i>Cyclops</i> sp.               | 5.09         | <i>Cyclops nanus</i>             | 5.29         | <i>Brachionus rubens</i>         | 6.21         | <i>Ceriodaphnia cornuta</i>      | 6.45         |
| <i>Brachionus quadridentatus</i> | 4.77         | <i>Cyclops</i> sp.               | 5.28         | <i>Diaptomus</i> sp.             | 6.06         | <i>Keratella cochlearis</i>      | 5.94         |
|                                  |              | <i>Diaptomus</i> sp.             | 5.19         | <i>Brachionus</i> sp.            | 6.02         | <i>Diaptomus</i> sp.             | 5.08         |
|                                  |              |                                  |              | <i>Cyclops nanus</i>             | 5.69         | <i>Cyclops nanus</i>             | 5.05         |
| <b>Total</b>                     | <b>91.03</b> |                                  | <b>95.90</b> |                                  | <b>90.35</b> |                                  | <b>92.04</b> |

**Supplementary Table S3.** Pearson's correlation coefficient among ecological parameters, zooplankton abundance and diversity indices (a) December (b) February

|     | T      | pH     | DO     | TR     | TDS    | N             | P             | R            | CP           | CC     | NP     | TZ       | H'            | e      | J             | D |
|-----|--------|--------|--------|--------|--------|---------------|---------------|--------------|--------------|--------|--------|----------|---------------|--------|---------------|---|
| T   | 1      |        |        |        |        |               |               |              |              |        |        |          |               |        |               |   |
| pH  | -0.253 | 1      |        |        |        |               |               |              |              |        |        |          |               |        |               |   |
| DO  | -0.207 | 0.836  | 1      |        |        |               |               |              |              |        |        | <b>a</b> |               |        |               |   |
| TR  | 0.703  | -0.553 | -0.457 | 1      |        |               |               |              |              |        |        |          |               |        |               |   |
| TDS | 0.177  | -0.124 | -0.006 | 0.198  | 1      |               |               |              |              |        |        |          |               |        |               |   |
| N   | -0.275 | -0.534 | -0.288 | 0.294  | 0.074  | 1             |               |              |              |        |        |          |               |        |               |   |
| P   | -0.163 | -0.356 | -0.151 | 0.203  | 0.231  | 0.673         | 1             |              |              |        |        |          |               |        |               |   |
| R   | -0.090 | -0.218 | -0.257 | 0.251  | 0.259  | 0.524         | 0.281         | 1            |              |        |        |          |               |        |               |   |
| CP  | -0.140 | -0.729 | -0.555 | 0.152  | 0.279  | <b>0.719</b>  | 0.324         | 0.539        | 1            |        |        |          |               |        |               |   |
| CC  | -0.528 | 0.070  | 0.325  | -0.293 | 0.416  | 0.397         | 0.214         | -0.098       | 0.332        | 1      |        |          |               |        |               |   |
| NP  | 0.098  | -0.158 | 0.094  | 0.392  | -0.030 | 0.528         | 0.291         | 0.553        | 0.162        | -0.150 | 1      |          |               |        |               |   |
| TZ  | -0.297 | -0.366 | -0.162 | 0.150  | 0.400  | <b>0.809</b>  | 0.416         | <b>0.797</b> | <b>0.798</b> | 0.449  | 0.515  | 1        |               |        |               |   |
| H'  | -0.469 | -0.160 | -0.189 | -0.042 | 0.041  | <b>0.602</b>  | <b>0.826</b>  | 0.552        | 0.291        | 0.053  | 0.295  | 0.481    | 1             |        |               |   |
| e   | -0.131 | -0.227 | 0.029  | -0.118 | -0.224 | 0.208         | <b>0.678</b>  | -0.252       | -0.004       | -0.026 | 0.051  | -0.134   | 0.461         | 1      |               |   |
| J   | -0.481 | 0.001  | -0.161 | -0.087 | -0.014 | 0.446         | <b>0.692</b>  | 0.537        | 0.122        | -0.051 | 0.216  | 0.355    | <b>0.965</b>  | 0.319  | 1             |   |
| D   | 0.468  | 0.266  | 0.166  | -0.004 | -0.081 | <b>-0.756</b> | <b>-0.910</b> | -0.478       | -0.403       | -0.230 | -0.352 | -0.567   | <b>-0.961</b> | -0.533 | <b>-0.868</b> | 1 |

|     | T      | pH     | DO     | TR           | TDS    | N      | P            | R             | CP     | CC            | NP     | TZ     | H'            | e             | J             | D |
|-----|--------|--------|--------|--------------|--------|--------|--------------|---------------|--------|---------------|--------|--------|---------------|---------------|---------------|---|
| T   | 1      |        |        |              |        |        |              |               |        |               |        |        |               |               |               |   |
| pH  | -0.601 | 1      |        |              |        |        |              |               |        |               |        |        | <b>b</b>      |               |               |   |
| DO  | -0.549 | 0.778  | 1      |              |        |        |              |               |        |               |        |        |               |               |               |   |
| TR  | 0.902  | -0.695 | -0.567 | 1            |        |        |              |               |        |               |        |        |               |               |               |   |
| TDS | -0.169 | 0.004  | -0.066 | 0.032        | 1      |        |              |               |        |               |        |        |               |               |               |   |
| N   | -0.054 | -0.495 | -0.277 | 0.090        | 0.153  | 1      |              |               |        |               |        |        |               |               |               |   |
| P   | 0.008  | -0.342 | 0.038  | 0.168        | 0.225  | 0.632  | 1            |               |        |               |        |        |               |               |               |   |
| R   | 0.176  | 0.315  | 0.056  | 0.028        | 0.355  | -0.176 | -0.471       | 1             |        |               |        |        |               |               |               |   |
| CP  | -0.131 | -0.482 | -0.270 | 0.130        | 0.238  | 0.418  | 0.190        | -0.382        | 1      |               |        |        |               |               |               |   |
| CC  | -0.035 | -0.400 | -0.199 | 0.025        | 0.070  | 0.474  | <b>0.847</b> | <b>-0.645</b> | 0.178  | 1             |        |        |               |               |               |   |
| NP  | 0.291  | 0.110  | 0.079  | 0.046        | 0.019  | -0.246 | -0.541       | <b>0.798</b>  | -0.186 | <b>-0.629</b> | 1      |        |               |               |               |   |
| TZ  | 0.161  | -0.409 | -0.286 | 0.161        | 0.504  | 0.456  | 0.244        | 0.320         | 0.497  | 0.196         | 0.436  | 1      |               |               |               |   |
| H'  | 0.318  | -0.264 | -0.349 | 0.451        | 0.367  | 0.353  | 0.572        | -0.140        | 0.060  | 0.474         | -0.490 | 0.093  | 1             |               |               |   |
| e   | -0.266 | 0.440  | 0.113  | -0.320       | -0.056 | -0.016 | 0.245        | -0.130        | -0.392 | 0.402         | -0.483 | -0.285 | 0.436         | 1             |               |   |
| J   | 0.486  | -0.455 | -0.411 | <b>0.669</b> | 0.355  | 0.316  | 0.470        | -0.141        | 0.178  | 0.283         | -0.384 | 0.067  | <b>0.900</b>  | 0.034         | 1             |   |
| D   | -0.200 | 0.107  | 0.254  | -0.297       | -0.304 | -0.317 | -0.576       | 0.143         | 0.080  | -0.521        | 0.543  | -0.002 | <b>-0.969</b> | <b>-0.638</b> | <b>-0.776</b> | 1 |

Abbreviations: T- Temperature; TR- Transparency; N- Nitrates; P- phosphates; R- Rotifera; CP- Copepoda; CC- Cladocera; NP- Nauplii; H'- Shannon-Weiner Diversity Index; e- Evenness Index; J- Margalef Species Richness Index; D- Dominance Index.
